# Supplementary material for: Molecularly Imprinted Ligand-Free Nanogels for Recognizing Bee Venom-Originated Phospholipase A2 Enzyme
Source: MDPI journal article supplement (doi:10.3390/polym14194200), 2022-10-07
Supplement: s1 [file s1]

# Molecularly Imprinted Ligand - Free Nanogels for recognizing bee venom - originated phospholipase A2 enzyme

Anamaria Zaharia<sup>#</sup>, Ana-Mihaela Gavrila<sup>#</sup>, Iuliana Caras, Bogdan Trica, Anita-Laura Chiriac, Catalina Ioana Gifu, Iulia Elena Neblea, Elena-Bianca Stoica, Sorin Viorel Dolana, Tanta-Verona Iordache\*

**Synthesis of difunctional macromer polyethyleneglycol diacrylate (PEGDA, MW=2000 g/mol)** according to Radu *et.al* [A. L. Radu, A. M. Gavrila, B. Cursaru, C. P. Spatarelu, T. Sandu, A. Sarbu, M. Teodorescu, F. X. Perrin, T. V. Iordache, A. Zaharia; "Poly (ethylene Glycol) Diacrylate-Nanogels Synthesized by Mini-emulsion Polymerization"; (2019), 56, No. 3, 2019, 514-519].

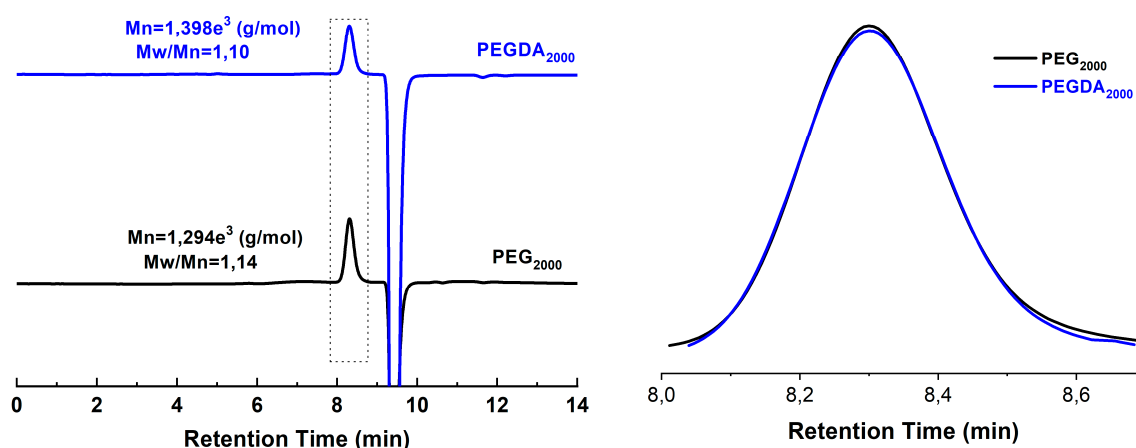

**Figure S1:** Molecular weight distribution by size exclusion chromatography corresponding to the precursor PEG<sub>2000</sub> and the synthesized PEGDA<sub>2000</sub> macromer (the latter showing a slightly higher molecular weight due to acrylate insertion as end groups to the PEG<sub>2000</sub> precursor)

Further on, by comparing the areas of the peaks corresponding to the protons from the CH<sub>2</sub> group (non-equivalent AB system), ( $\delta = 6.42$  and  $\delta = 5.83$  ppm) with the protons of the oxyethylene units (CH<sub>2</sub>CH<sub>2</sub>O) ( $\delta = 3.78$  ppm) from the <sup>1</sup>H-NMR spectra (**Fig. S2**) the functionality of the synthesized PEGDA<sub>2000</sub> was determined, using the following equation:

$$\overline{f}(\text{acrylic groups}) = \frac{A_{\text{methylene}}}{A_{\text{oxyethylene}} / 4} \times \overline{DP}_{n\text{PEG}}$$

The synthesized macromer presented a functionalization yield of 84 % and a diacrylate functionality of 1.67 PEG. These parameters investigated by the NMR technique were particularly important in the synthesis stage of molecularly imprinted nanogels by inverse emulsion. A macromer with functionality higher than 1.5 will favour the obtaining of more

crosslinked networks that will ultimately increase the thermal and mechanical stability of nanogels and protect the imprinted cavities against physical deformations. Damaging the binding sites may lead to partial recognition of the template and, thus, low specificity.

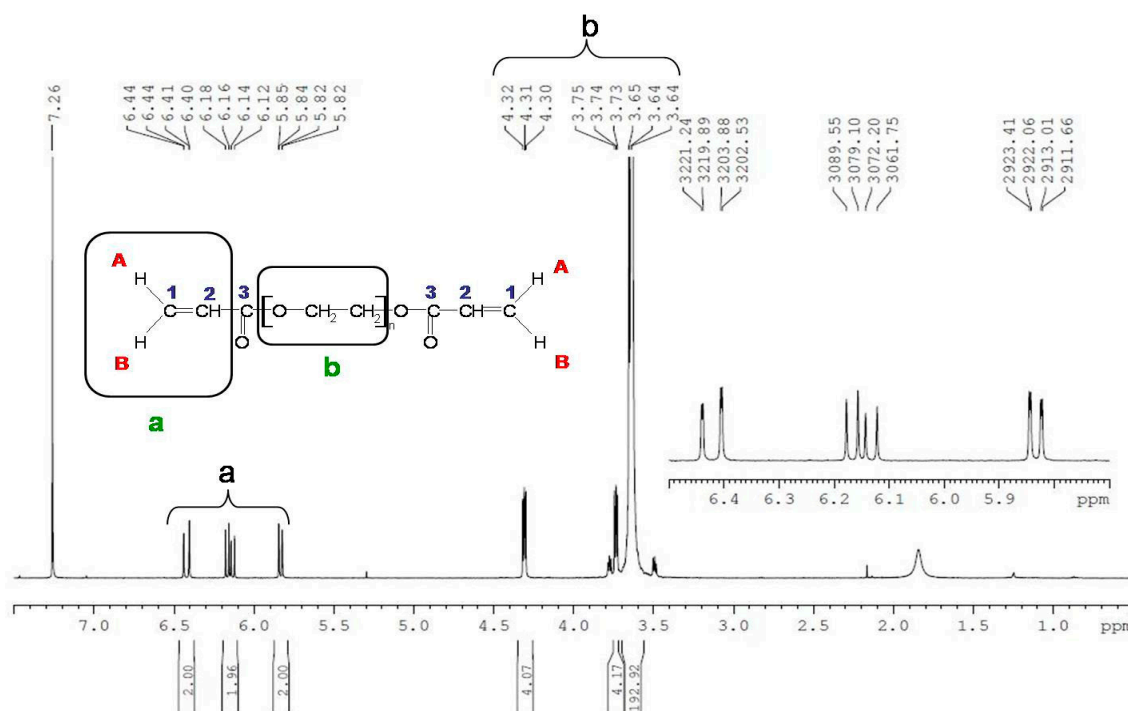

**Figure S2:**  $^1\text{H}$ - NMR spectrum of synthesized PEGDA<sub>2000</sub> macromer

The characteristic FTIR spectrum of the macromonomer obtained by the route of polyethylene glycol and acryloyl chloride (PEGDA<sub>2000</sub>) is shown in **Fig. S3**. Thus, the spectrum presented a broad absorption band at  $3464\text{ cm}^{-1}$ , characteristic of the O-H groups in PEG. The band at  $2885\text{ cm}^{-1}$  was attributed to the characteristic stretching vibrations of C-H group, while the bands at  $1464\text{ cm}^{-1}$  and  $1346\text{ cm}^{-1}$  were assigned to the formation vibrations characteristic of the C-H groups. The bands at  $1281\text{ cm}^{-1}$  and  $1109\text{ cm}^{-1}$  are characteristic for the stretching vibrations corresponding to the O-H and C-O-H groups, respectively, in PEG. Further on, the band at  $1725\text{ cm}^{-1}$  was attributed to the protonated carboxylate groups ( $-\text{C}=\text{O}$ ), while the band at  $1636\text{ cm}^{-1}$  was associated with the asymmetric and symmetric stretching vibrations of  $-\text{C}-\text{O}$  in the same carboxylate groups.

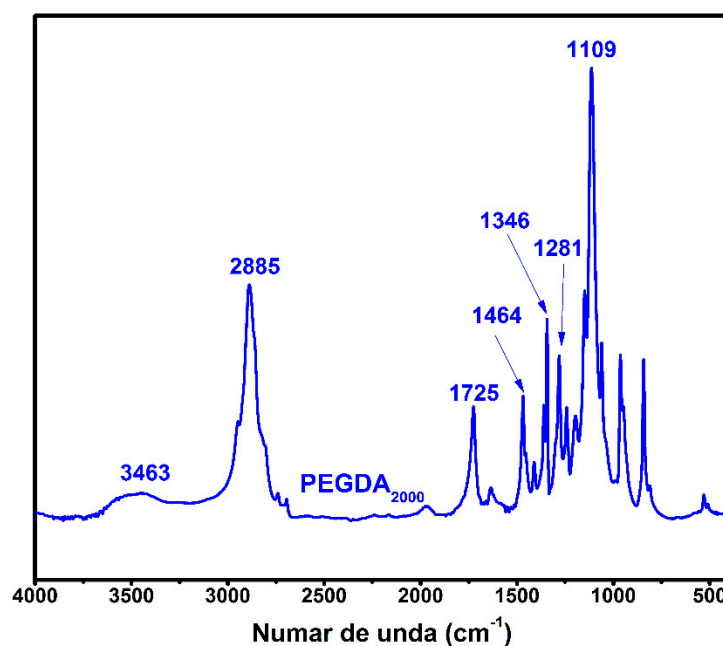

**Figure S3.** FTIR spectra of synthesized PEGDA<sub>2000</sub> monomer

**Fig. S4** shows the characteristic TGA and DTG curves of the synthesized PEGDA<sub>2000</sub> macromer. Its thermal behaviour shows a single stage of thermal degradation. Thus, the thermogravimetric analysis recorded a weight loss of 99.99% in the range 303-456 °C, with a maximum decomposition temperature of 395.82 °C. This degradation step was associated with the decomposition process of the PEGDA backbone.

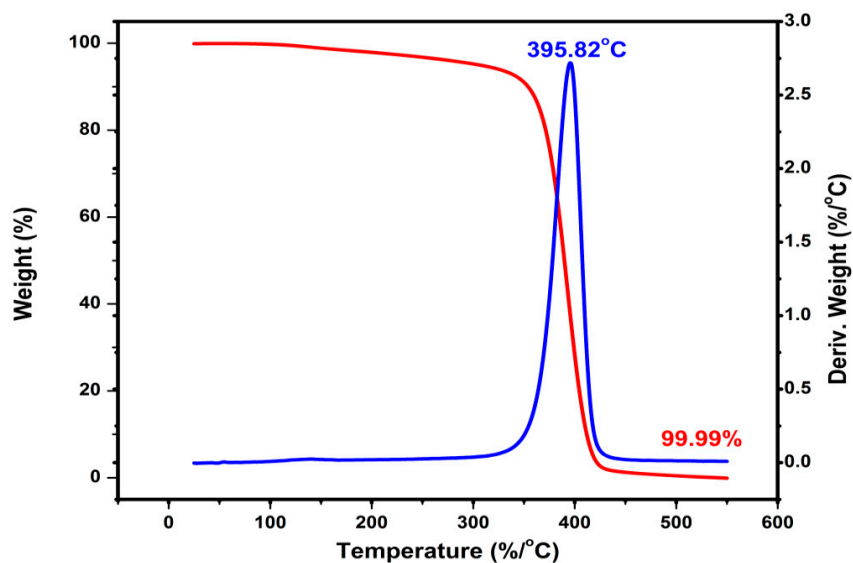

**Figure S4.** TGA/DTG curves of synthesized PEGDA<sub>2000</sub> monomer

### Optimization results for the synthesis of nanogels

For the synthesized nanogels, the influence of the macromer composition (PEGDA2000, PEGDA700, and mixture of 75% PEGDA700 with 25% PEGDA2000) on the particle size distribution and polydispersity was followed for choosing the proper system to deliver particles ranging from 150-200 nm and with low polydispersity. DLS data are shown in Table S1. For the molecularly imprinted nanoparticles for which the enzyme was dissolved in water, the registered sizes were 152 – 163 nm while the ones with PLA2 dissolved in TRIS showed sizes in the range of 123 – 189 nm. The system with the most desired properties was MIP2-7 (T), or as noted in the main text MIP-LFNG (T), having also the lowest PDI in the series.

**Table S1.** DLS results corresponding to the optimization study for the synthesis of MIP-LFNGs

| Sample code               | Average diameter of nanogels, (nm) | PDI          |
|---------------------------|------------------------------------|--------------|
| NIP7                      | 163 ± 7.7                          | 0.326        |
| NIP2                      | 177 ± 0.5                          | 0.444        |
| NIP7-2 (NIP-LFNGs)        | 142 ± 1.1                          | 0.326        |
| MIP7(W)                   | 152 ± 0.7                          | 0.184        |
| MIP2(W)                   | 153 ± 0.5                          | 0.183        |
| MIP7-2(W) (MIP-LFNGs (W)) | 198 ± 3.91                         | 0.375        |
| MIP7(T)                   | 123 ± 0.6                          | 0.286        |
| MIP2(T)                   | 177 ± 0.7                          | 0.227        |
| MIP7-2(T) (MIP-LFNGs (T)) | 189 ± 9.2                          | <b>0.184</b> |

The data collected from TEM for the nanogel systems with either PEGDA<sub>700</sub> or PEGDA<sub>2000</sub> alone, after purification and redispersion, recorded sizes between 140 – 500 nm

and even higher. Some of the gels were around 2  $\mu\text{m}$  large and were agglomerated (see **Fig. S5**).

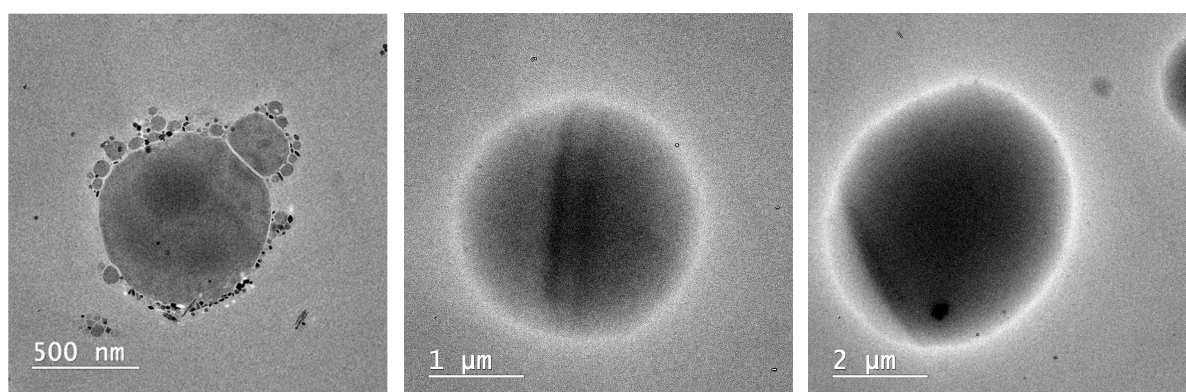

**Figure S5.** TEM images of redispersed NIP<sub>7</sub>, MIP<sub>7</sub> (T) and MIP<sub>7</sub> (W)

#### Activity measurements of PLA2 and cytotoxicity

**Table S1:** PLA2 activity in solution and venom before and after contact with the LFNGs

| <b>C<sub>r</sub> (U/mL) <math>\pm</math> SD (<i>n</i>=2)</b> |                     |                              |                          |                          |                          |
|--------------------------------------------------------------|---------------------|------------------------------|--------------------------|--------------------------|--------------------------|
| <b>Sample</b>                                                |                     | <b>15 min<br/>490<br/>nm</b> | <b>30 min<br/>490 nm</b> | <b>15 min<br/>450 nm</b> | <b>30 min<br/>450 nm</b> |
| <b>PLA2<br/>solution</b>                                     | <b>NIP-LFNG</b>     | 17.9 $\pm$ 2.9               | 8.7 $\pm$ 12.3           | 21.0 $\pm$ 13.4          | 10.4 $\pm$ 14.7          |
|                                                              | <b>MIP-LFNG (W)</b> | 11.9 $\pm$ 8.7               | 4.3 $\pm$ 6.1            | 15.0 $\pm$ 8.1           | 7.4 $\pm$ 10.5           |
|                                                              | <b>MIP-LFNG (T)</b> | 328.8 $\pm$ 5.7              | 353.6 $\pm$ 7.9          | 319.6 $\pm$ 4            | 348.8 $\pm$ 6.8          |
| <b>Venom</b>                                                 | <b>NIP-LFNG</b>     | 424.8 $\pm$ 19.2             | 458.0 $\pm$ 34.5         | 423.2 $\pm$ 22.6         | 448.4 $\pm$ 30.0         |
|                                                              | <b>MIP-LFNG (W)</b> | 400.0 $\pm$ 11.3             | 432.0 $\pm$ 5.7          | 393.2 $\pm$ 15.3         | 422.0 $\pm$ 8.5          |
|                                                              | <b>MIP-LFNG (T)</b> | 420.4 $\pm$ 8.5              | 470.0 $\pm$ 5.1          | 413.2 $\pm$ 11.9         | 452.8 $\pm$ 4.5          |
| <b>C<sub>i</sub> (U/mL) <math>\pm</math> SD (<i>n</i>=2)</b> |                     |                              |                          |                          |                          |
| <b>PLA2 solution*</b>                                        |                     | 378.4 $\pm$ 9.1              | 403.6 $\pm$ 19.8         | 370.8 $\pm$ 7.4          | 394.0 $\pm$ 16.4         |

|                |           |           |           |           |
|----------------|-----------|-----------|-----------|-----------|
| <b>Venom**</b> | 436.0±3.4 | 471.6±4.0 | 436.4±4.0 | 457.6±4.5 |
|----------------|-----------|-----------|-----------|-----------|

\*  $C_i$  (U/mL) is the initial concentration (activity of PLA2 in 0.1 mg/mL PLA2 feed solution)

\*\*  $C_i$  (U/mL) is the initial concentration (activity of PLA2 in 1 mg/mL bee venom feed solution)

**Table S2:** Cell Viability of L929 cell line after 24 H exposure to various dilutions of LFNGs

| <div>Sample code</div> <div>Dilution</div> | Cell Viability (%) ± SD (n=3)* |              |           |
|--------------------------------------------|--------------------------------|--------------|-----------|
|                                            | MIP-LFNG (W)                   | MIP-LFNG (T) | NIP       |
| <b>D 1/4</b>                               | 100.8±1.3                      | 98.0±1.3     | 109.0±4.4 |
| <b>D 1/8</b>                               | 99.9±0.2                       | 102.0±4.5    | 108.0±0.5 |
| <b>D 1/16</b>                              | 97.6±1.7                       | 100.0±3.3    | 105±2.8   |
| <b>D 1/32</b>                              | 99.3±1.3                       | 101.0±2.8    | 107±0.2   |

\*The mean value of 5 measurements for the reference cells was 100.0±2.0
